# Supplementary material
Source: bioRxiv or medRxiv preprint supplement (https://www.biorxiv.org/highwire/filestream/139099/field_highwire_adjunct_files/3/458836-4.pdf)
Supplement: Supplementary file [file 458836-4.pdf]

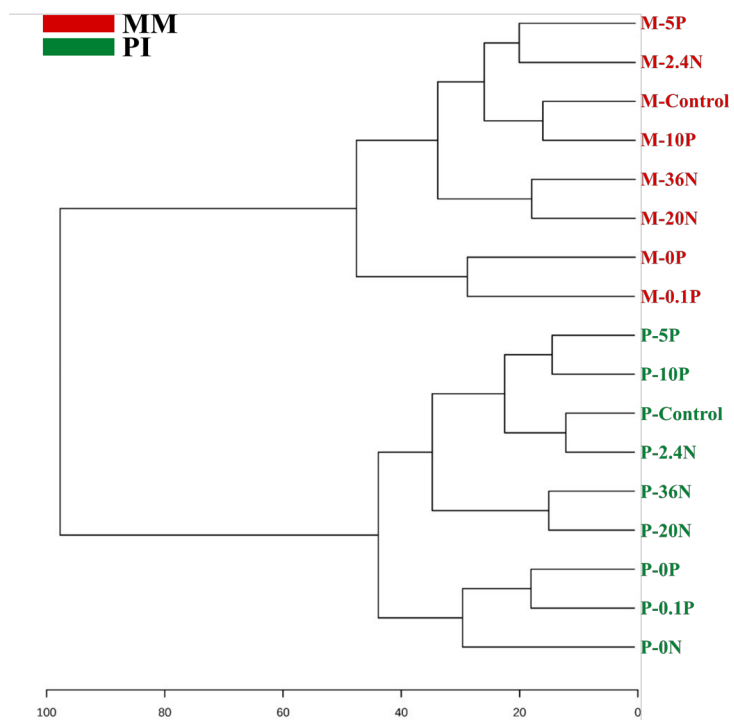

**Fig. S4.** cluster analysis of known primary metabolites in **MM** and **PI** seeds in response to different concentration of nitrate (0N, 2.4N, 12.4N, 14N and 20N) and phosphate (0P, 0.1P, 1P, 5P and 10P) during maternal growth.
